# Supplementary material for: Randomized controlled trial of robot-assisted gait training with dorsiflexion assistance on chronic stroke patients wearing ankle-foot-orthosis
Source: Springer Nature journal article supplement (doi:10.1186/s12984-018-0394-7), 2018-06-18
Supplement: MOESM1 [file 15857434]

Supplemental Figures

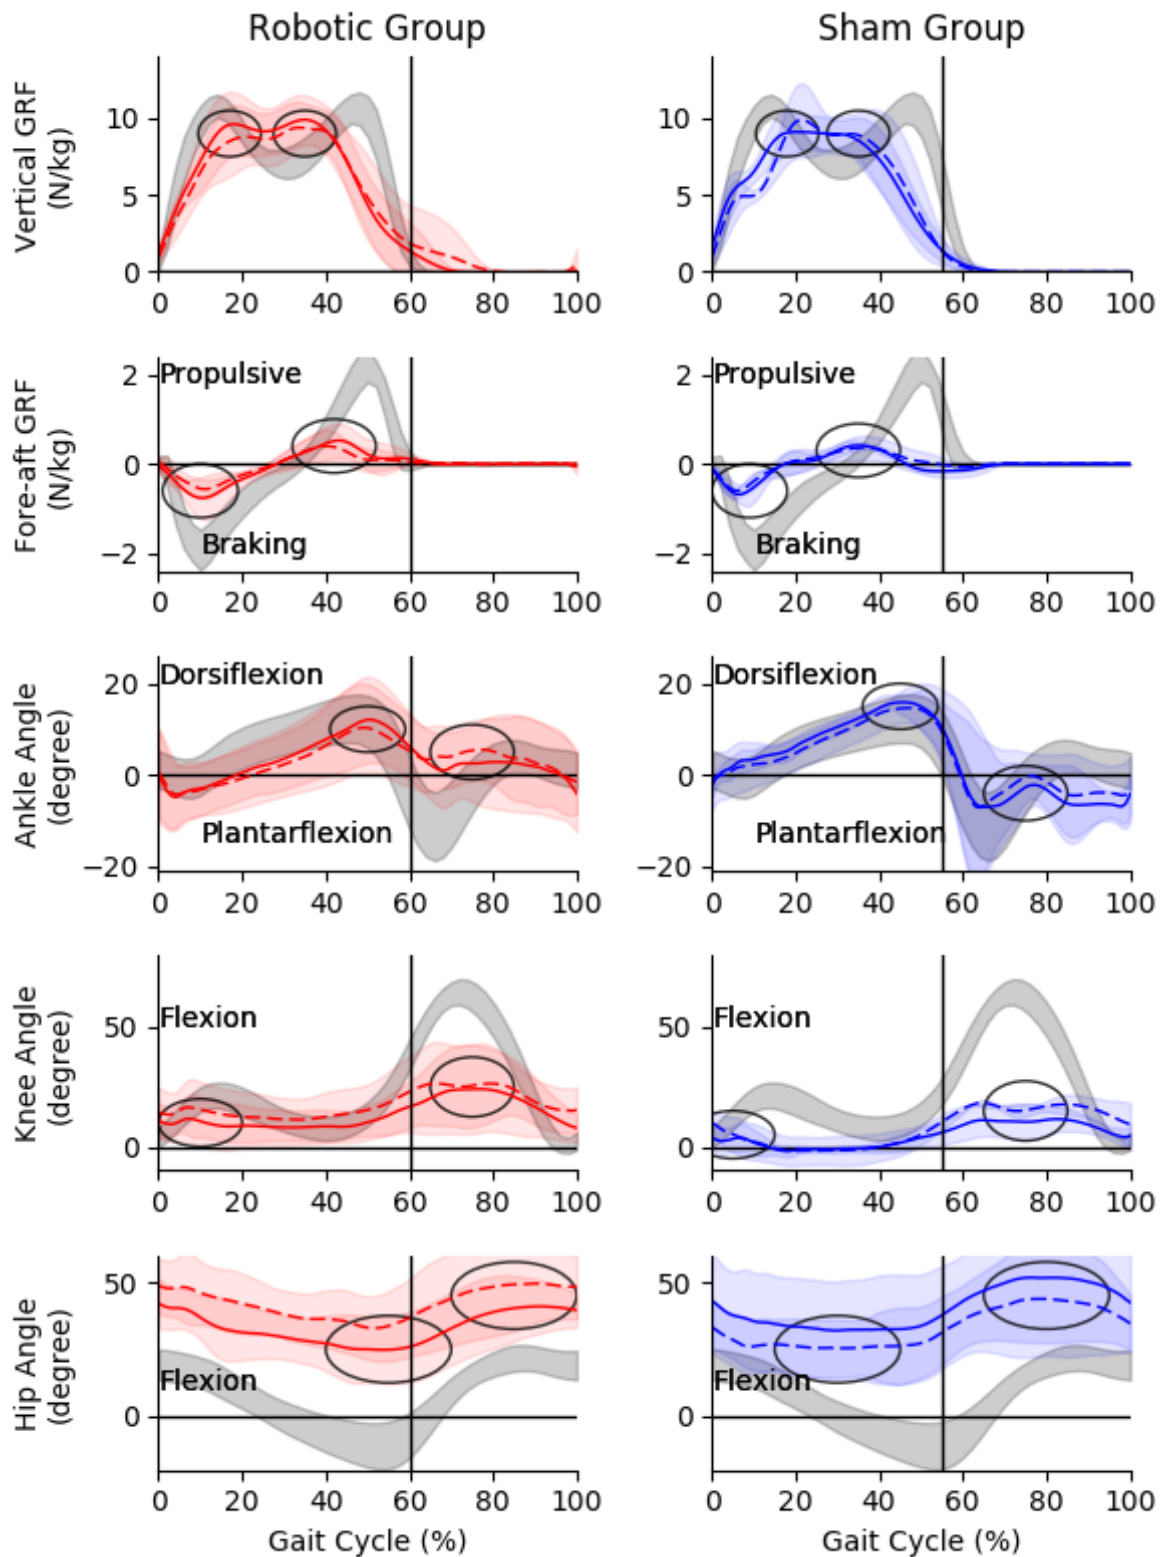

FIGURE I. Affected side kinetic and kinematic gait pattern in the gait analysis before (Pre: dashed line) and after (Post: solid line) the gait training. Local maxima and point of interests were circled. Gait patterns of healthy subject were shaded in grey for reference.

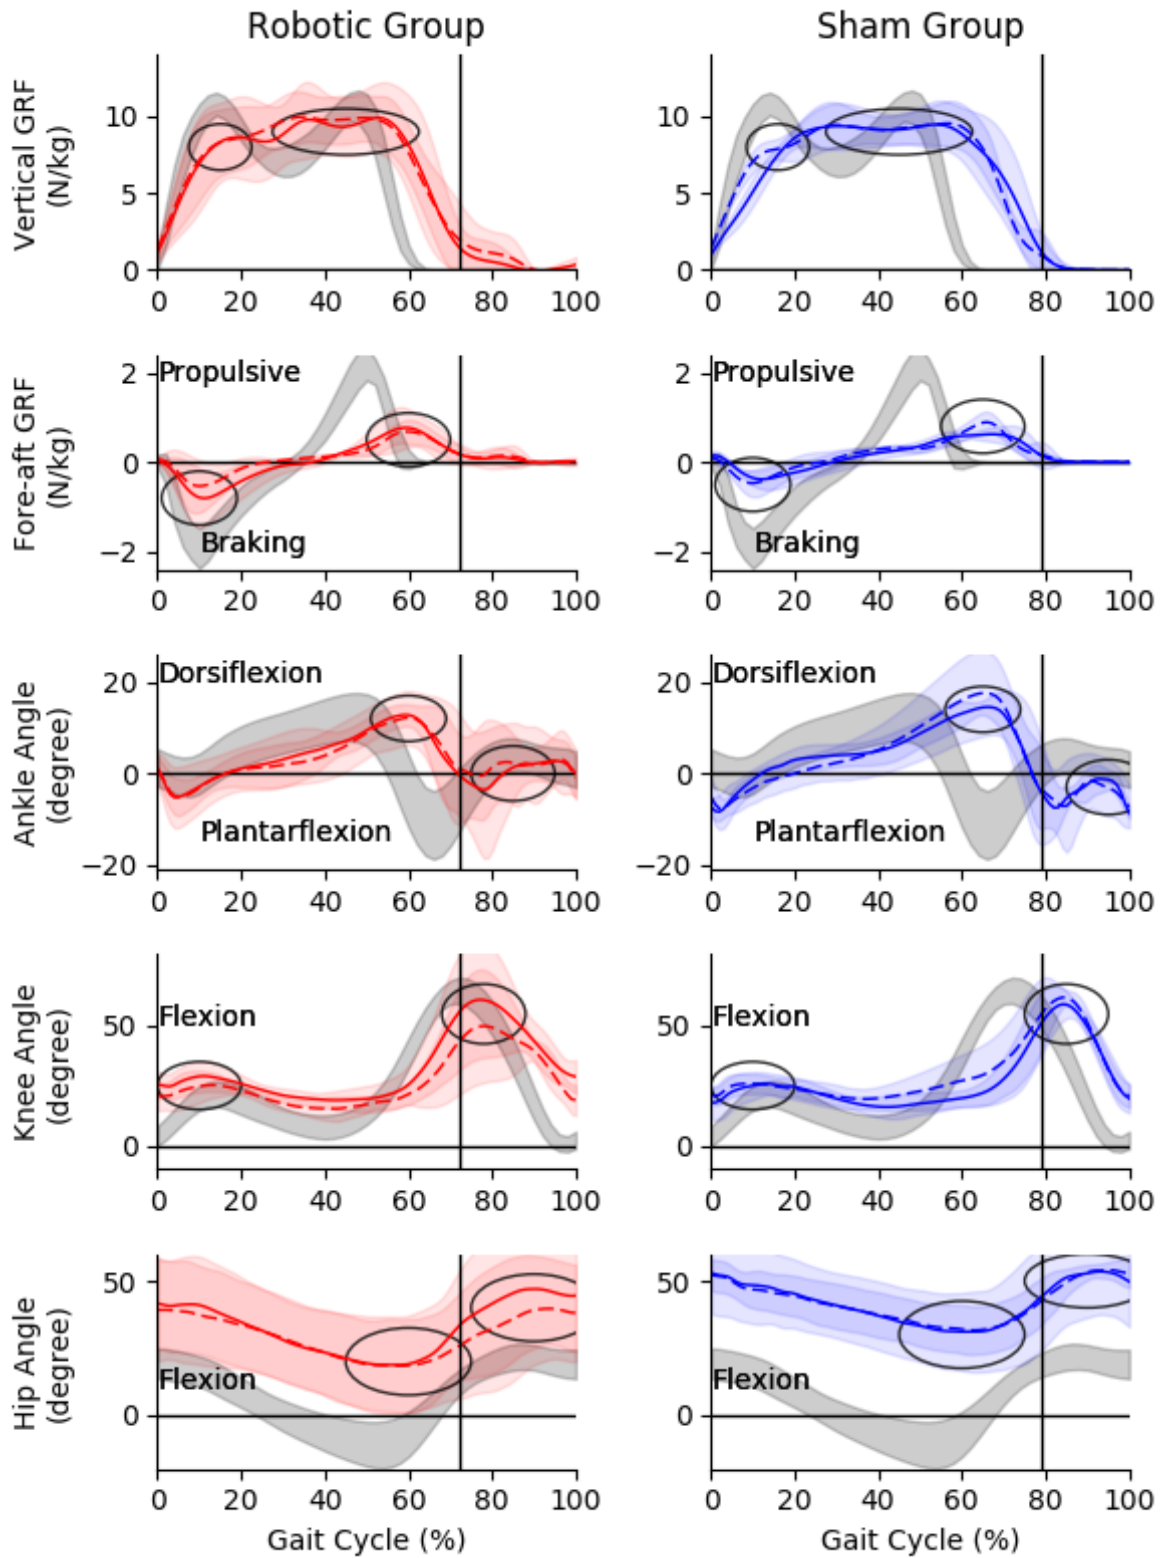

FIGURE II. Unaffected side kinetic and kinematic gait pattern in the gait analysis before (Pre: dashed line) and after (Post: solid line) the gait training. Local maxima and point of interests were circled. Gait patterns of healthy subject were shaded in grey for reference.
